# Supplementary material for: Sequence-Based Analysis of Translocations and Inversions in Bread Wheat (Triticum aestivum L.)
Source: PLoS One. 2013 Nov 15;8(11):e79329. doi: 10.1371/journal.pone.0079329 (PMC3829836; doi:10.1371/journal.pone.0079329)
Supplement: Table S4 — Brachypodium orthologs on modern chromosome arm ‘4AS’. (XLSX) [file pone.0079329.s004.xlsx]

## Sheet: S4
Table S4. Brachypodium orthologs on modern chromosome arm '4AS'#
Set	Gene	Location	Wheat EST	Bin
1	Bradi4g14040	'4AS',4BL,4DL	BE446652	C-4AS1-0.20
	Bradi1g61050	'4AS',4BL,4DL	BF145268	C-4AS1-0.20
	Bradi1g64060	'4AS',4BL,4DL,2AS,2BS,2DS	BG607575	C-4AL12-0.43
	Bradi1g64530	'4AS',4BL,4DL	BE405190	C-4AS1-0.20
	Bradi1g65140	'4AS',4BL,4DL	BE404963	C-4AL12-0.43
	Bradi1g65300	'4AS',4BL,4DL	BG604639	C-4AL12-0.43
	Bradi1g68670	'4AS',4BL,4DL	BE403881	C-4AL12-0.43
	Bradi1g74860	'4AS',4BL,4DL	BF429115	4AS1-0.20-0.63
	…	…
	Bradi1g74910	'4AS',4BL,4DL,1AL,1BL,1DL
	Bradi1g74916	'4AS',4BL,4DL,3B,3AS,2BS,5BL,6DL
	Bradi1g74922	'4AS',4BL,4DL,1AL,1BL,1DL,2BS,3B,3AS,5BL,6DL	BE494848	4AS3-0.76-1.00
2	Bradi4g15350	'4AS',4BS,4DS,4DL,3AL,3B,3DL	BF483255	C-4AS1-0.20
	Bradi4g15337	'4AS',4BS,4DS
	Bradi4g14900*	'4AS',4BS,4DS, '4AL'
	Bradi4g14830*	'4AS',4BS,4DS, '4AL'
	Bradi4g14490	'4AS',4BS,4DS,5AL,5BL,5DL
# The two duplicated genes are marked by '*'. The reason to include them in the group concerned are discussed in the text.
