# Supplementary material for: Sequence-Based Analysis of Translocations and Inversions in Bread Wheat (Triticum aestivum L.)
Source: PLoS One. 2013 Nov 15;8(11):e79329. doi: 10.1371/journal.pone.0079329 (PMC3829836; doi:10.1371/journal.pone.0079329)
Supplement: Table S6 — Wheat sequences detected by Brachypodium orthologs on either side of Bradi2g54210. (XLSX) [file pone.0079329.s006.xlsx]

## Sheet: S6
Table S6: Wheat sequences detected by Brachypodium orthologs on either side of Bradi2g54210
Gene	Location
Bradi2g54110	3B,5DL
Bradi2g54120	1AL,1BL,1DL,3AL,3B,3DL
Bradi2g54127	3AL,3B,3DL
Bradi2g54140	1AL,1BL,1DL,3B
Bradi2g54150	3AL,3B,3DL
Bradi2g54160	1AL,1BL,1DL,3AL,3B,3DL
Bradi2g54170	3AL,3B,3DL
Bradi2g54177	3BL
Bradi2g54190	'4AS',4BL,4DL,3AL,3B,3DL
Bradi2g54200	1AL,1BL,1DL,1AS,1BS,1DS,2AL,2DL,2AS,2BS,3AL,3B,3DL,3AS,3DS,5AS,6AL,6AS,7BS
Bradi2g54210	'4AS', 4DS, 4DL, 1AL, 1BL, 1DL, 3AL, 3B, 3DL,5DL, 6DS, 7BS, 7DL
Bradi2g54220	3AL,3B,3DL
Bradi2g54230	1AL,1BL,1DL,3AL,3B,3DL
Bradi2g54240	1AL,1BL,1DL,3AL,3B,3DL,5BL
Bradi2g54250	2AL,2BL,3AL,3B,3DL,5AL,5BL,6AS,6BS,6DS,
Bradi2g54260	3AL,3B,3DL
Bradi2g54270	3DL
Bradi2g54280	ND
Bradi2g54290	1AL,1BL,1DL,3AL,3B,3DL
Bradi2g54300	3AL,3B,3DL
Bradi2g54330	3AL,3B,3DL
# 'ND' indicates that wheat sequences were not detected.
